# Supplementary material for: Novelty of Penicillium camembertii Lipase Supported on Glutaraldehyde Activated-SBA-15 Mesoporous Silica for Mono-Esterification of Bioglycerol in Non-Aqueous Media
Source: publisher site journal article supplement (doi:10.1515/ijcre-2014-0058), 2016-05-13
Supplement: Supplementary file 1 [file Supplementary_Material.pdf › Supplementary_Material.pdf]

## Supplementary Material

### **Novelty of *penicillium camemberti* lipase supported on glutaraldehyde activated-sba-15 mesoporous silica for mono-esterification of bioglycerol in non-aqueous media**

**Ganapati D. Yadav<sup>a\*</sup>, Moreshwar P. Hude<sup>a</sup>, Janusz Kozinski<sup>b</sup>, Ajay K. Dalai<sup>b</sup>**

<sup>a</sup> Department of Chemical Engineering, Institute of Chemical Technology,

Matunga, Mumbai, India - 400 019,

Email: [gd Yadav@yahoo.com](mailto:gd Yadav@yahoo.com), [gd.yadav@ictmumbai.edu.in](mailto:gd.yadav@ictmumbai.edu.in)

Tel: ++91-22-3361-1001/1111/2222, Fax: fax-+91-22-3361-1002/1020

<sup>b</sup>Department of Chemical Engineering

University of Saskatchewan

Saskatoon, Canada

\*Author to whom correspondence be addressed

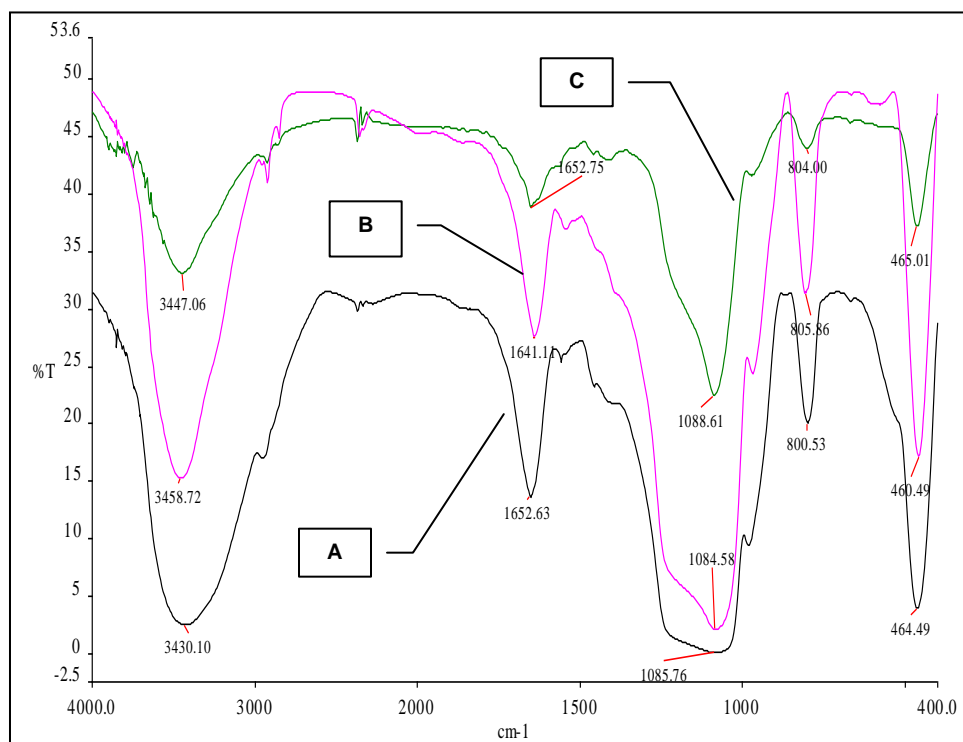

**Figure 1:** FT IR of the (A) SBA-15, (B) Lipase G supported on SBA-15, (C) Lipase G/SBA-15 crosslinked in glutaraldehyde.

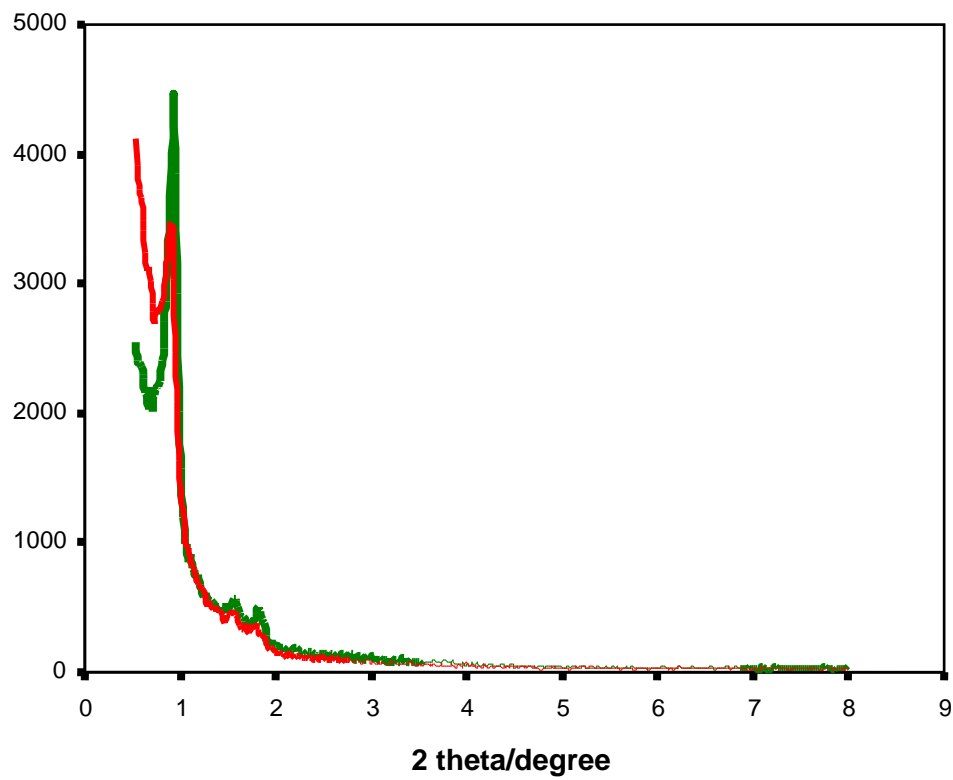

**Figure 2:** X-RD of SBA-15 and enzyme supported on SBA-15. — SBA-15 ;  
— SBA-15 immobilized with lipase.

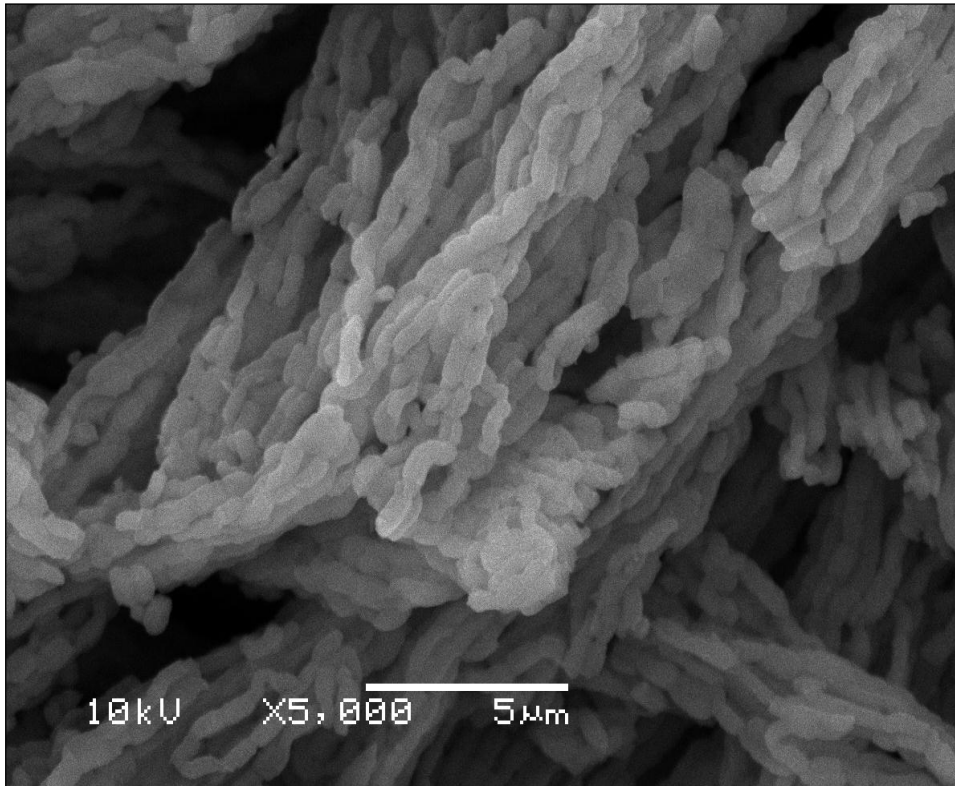

**Figure 3:** SEM image of SBA-15 mesoporous silica.

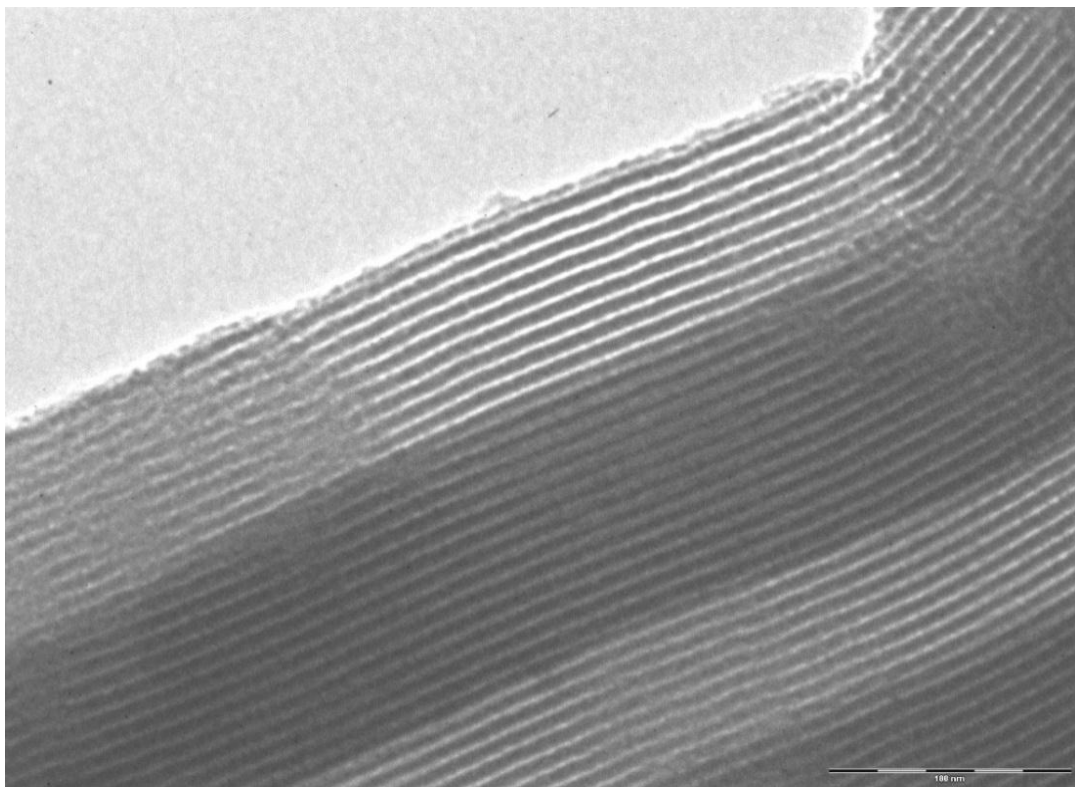

**Figure 4 :** TEM analysis –SBA-15.
